# Supplementary material for: From Waste to Taste: Application of Fermented Spent Rootlet Ingredients in a Bread System
Source: MDPI journal article supplement (doi:10.3390/foods12071549), 2023-04-06
Supplement: s1 [file s1]

## Descriptive Sensory Evaluation

### Personal Data

Name: .....

Date: .....

### Information

- The samples are bread samples with unfermented, sterilised and a variety of different strains of lactic acid bacteria fermented rootlets. Traces of the following allergens may be present: **gluten**, peanuts, tree nuts, celery, mustard, eggs, milk, sesame, fish, lupin, soya, sulphites, crustaceans, molluscs.
- All information provided is confidential and the results will not be associated with your name.
- The products have been produced under safe and food grade conditions.

Please confirm that (tick the circle)

- ☐ You are aware that the participation in this sensory evaluation is voluntary.
- ☐ You are aware that products may contain the allergens reported above.

### Guidelines

There are 8 samples to be evaluated. Samples will be provided to you one at a time.

Please smell and taste the samples and estimate the intensity of each of the attributes by placing a line on the scale as shown in the example below. **Please place your marking on a line provided.** The attributes and their descriptions are listed in the accompanying Table 1. Adding comments is optional.

In between each sample, please cleanse your palate with water.

Example:

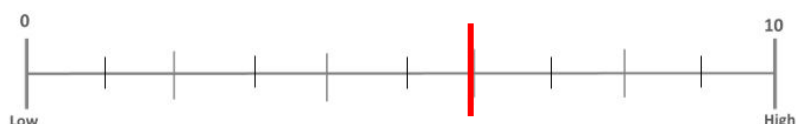

Sample:

### Odour

Overall  
intensity

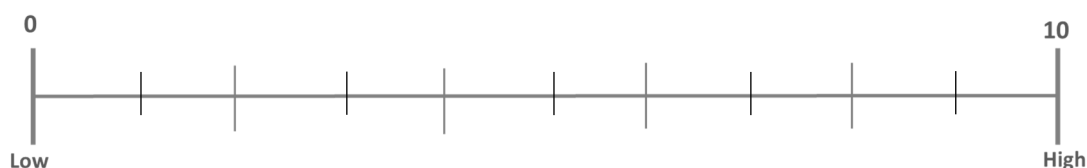

Citrus fruit

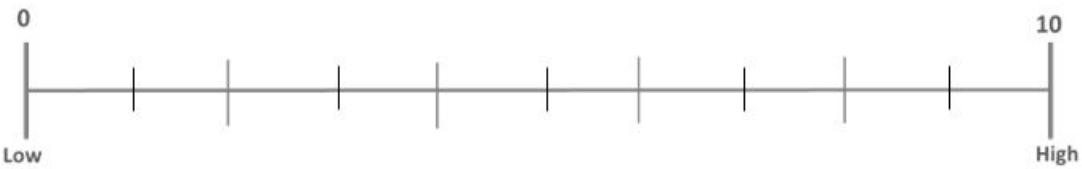

Vegetable

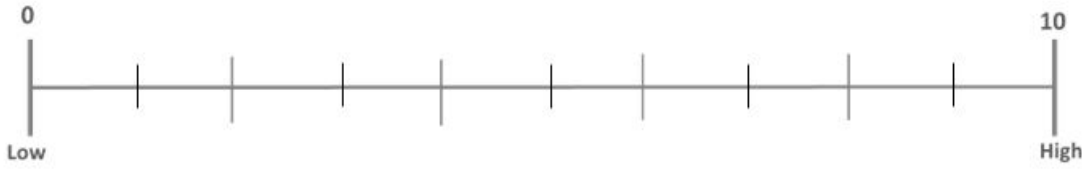

Cereal/grains

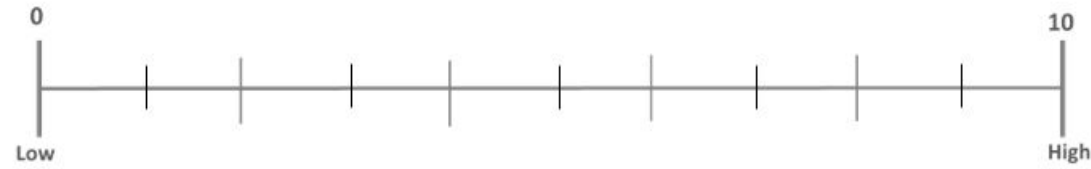

Comments:

---

---

---

Taste

Sour

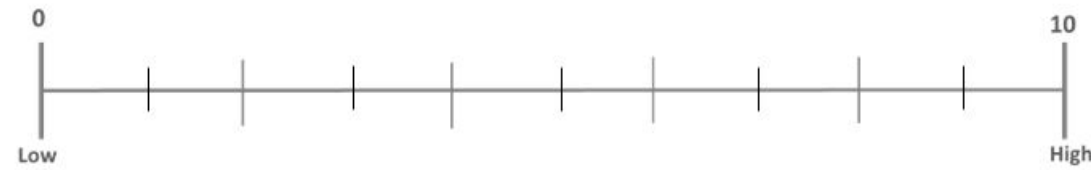

Sweet

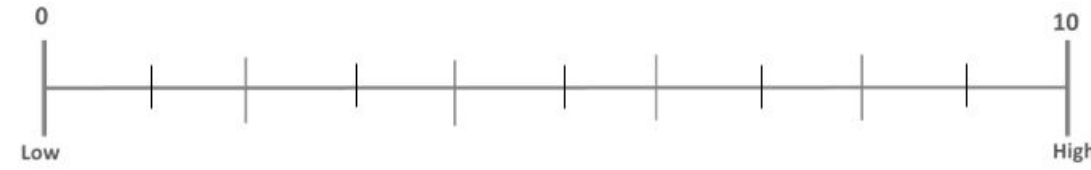

Salty

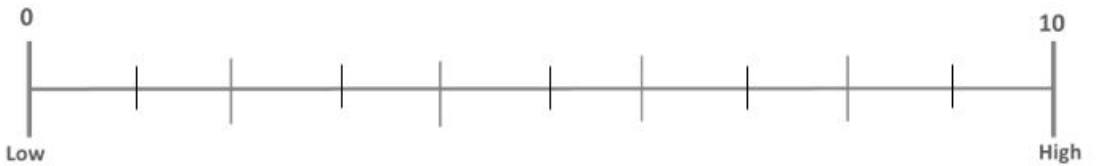

Comments:

---

---

---

Flavour

Overall  
intensity

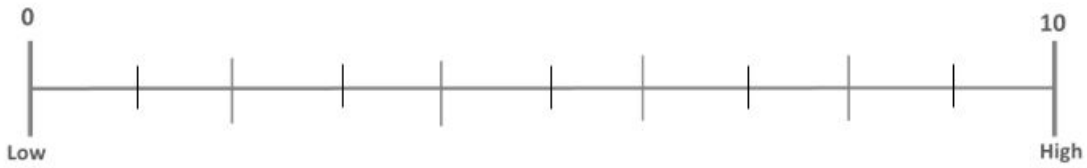

Muddy/Earthy

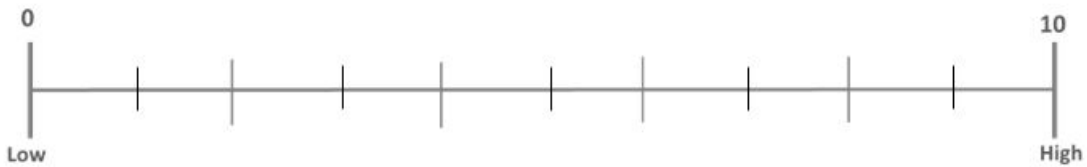

Dairy/Buttery

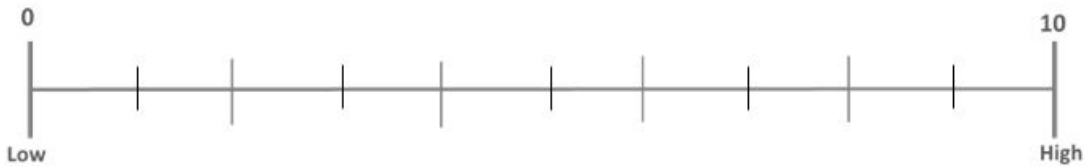

Fruity

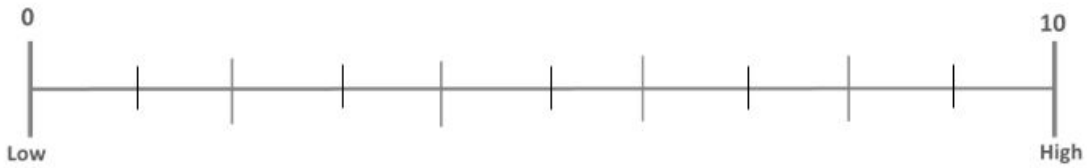

**Vegetable**

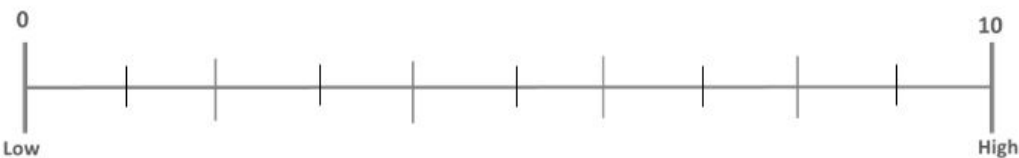

**Aftertaste**

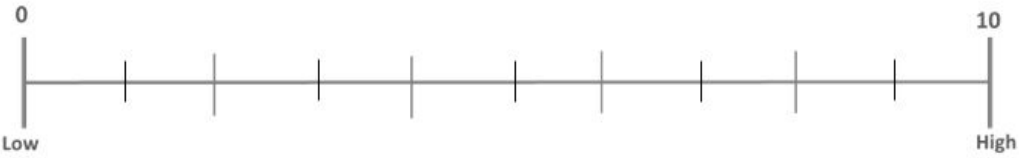

**Comments:**

---

---

---

**Texture**

**Hardness**

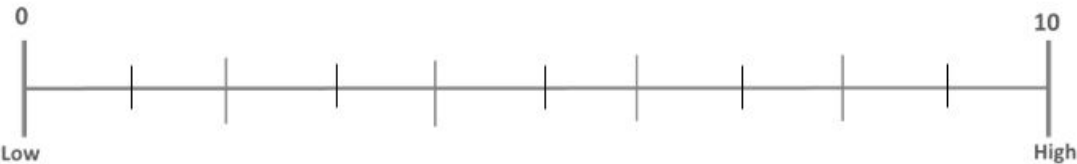

**Chewiness**

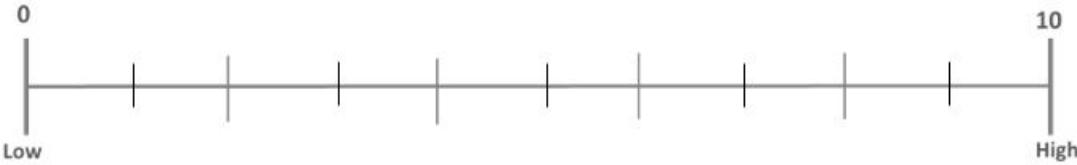

## Overall Acceptability

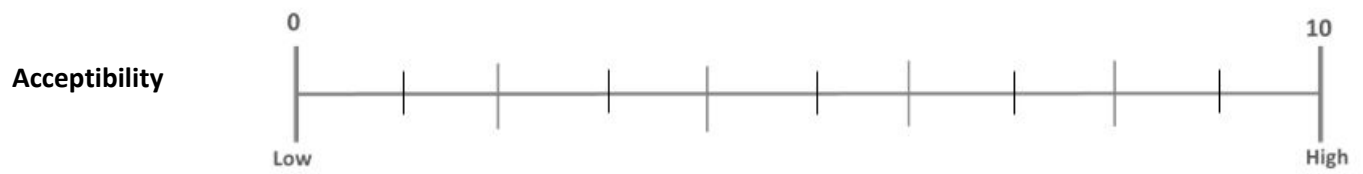

Figure S1. Questionnaire used for sensory analysis.
